# Supplementary material for: Is retroflexion a stable cue for distributional learning for speech sounds across languages? Learning for some bilingual adults, but not generalisable to a wider population in a well powered pre-registered study
Source: PeerJ journal article supplement (doi:10.7717/peerj.15467), 2023-07-10

# PCA\_screplot

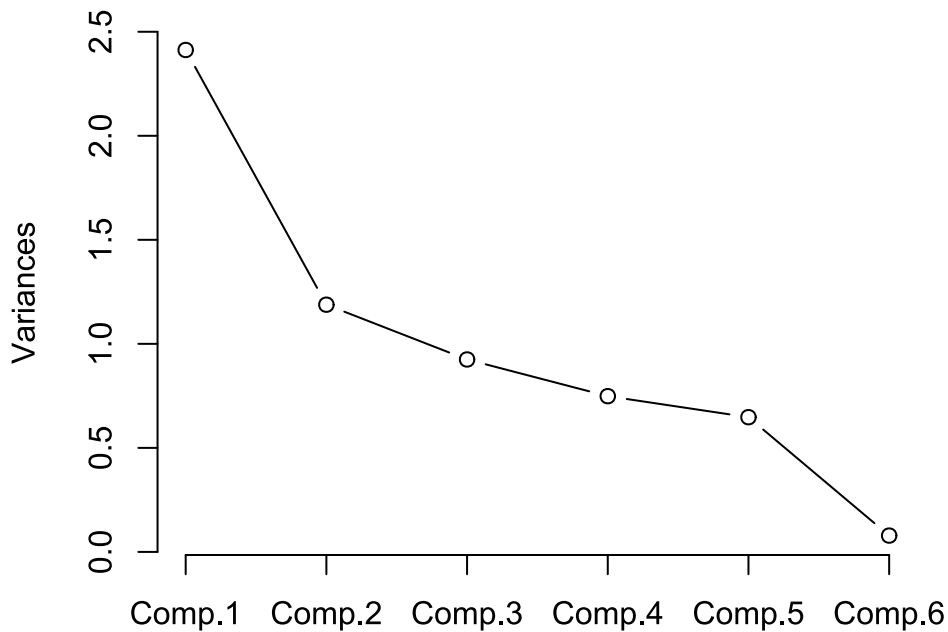

Supplement: PeerJ_PCA_screeplot.pdf [file PeerJ_PCA_screeplot.pdf]
