# Supplementary material for: Is retroflexion a stable cue for distributional learning for speech sounds across languages? Learning for some bilingual adults, but not generalisable to a wider population in a well powered pre-registered study
Source: PeerJ journal article supplement (doi:10.7717/peerj.15467), 2023-07-10
Supplement: Qualtrics_Language_ID_Questions.pdf [file Qualtrics_Language_ID_Questions.pdf]

Q490 This information is allows us to better understand your answers.

We will not collect identifying or sensitive information and your answers will be stored securely.

-----

Q1347 What is your nationality?

\_\_\_\_\_

-----

Q1348 What country did you mostly grow up in, during your pre-school (0-5 years old)?

\_\_\_\_\_

-----

Q1349 What country did you mostly go to school in, for your junior years (6-12 years old)?

\_\_\_\_\_

-----

Q1350 What country did you mostly go to school in for your high-school years (13-18 years old)?

\_\_\_\_\_

-----

Q442 What country have you mostly lived in for the past 3 years

\_\_\_\_\_

-----

Q1351 If you have lived in other countries for one year or more, please list them below:

\_\_\_\_\_

\_\_\_\_\_

\_\_\_\_\_

\_\_\_\_\_

\_\_\_\_\_

Q1336 For each of your languages (including dialects), tell us how good you are at... *Understanding when people speak*

7 = native-level, 1= a few words, 0=no knowledge

|                      | (1)                   | (2)                   | (3)                   | (4)                   | (5)                   | (6)                   | (7)                   | I don't understand this language (0) |
|----------------------|-----------------------|-----------------------|-----------------------|-----------------------|-----------------------|-----------------------|-----------------------|--------------------------------------|
| English (1)          | <input type="radio"/> | <input type="radio"/> | <input type="radio"/> | <input type="radio"/> | <input type="radio"/> | <input type="radio"/> | <input type="radio"/> | <input type="radio"/>                |
| Mandarin Chinese (2) | <input type="radio"/> | <input type="radio"/> | <input type="radio"/> | <input type="radio"/> | <input type="radio"/> | <input type="radio"/> | <input type="radio"/> | <input type="radio"/>                |
| Tamil (3)            | <input type="radio"/> | <input type="radio"/> | <input type="radio"/> | <input type="radio"/> | <input type="radio"/> | <input type="radio"/> | <input type="radio"/> | <input type="radio"/>                |
| Malay (4)            | <input type="radio"/> | <input type="radio"/> | <input type="radio"/> | <input type="radio"/> | <input type="radio"/> | <input type="radio"/> | <input type="radio"/> | <input type="radio"/>                |

Q1337 Are there other languages/dialects that you understand when people speak?

Yes (1)

No (2)

Display This Question:

If Q1337 = Yes

Q1338

|                            | (1)                   | (2)                   | (3)                   | (4)                   | (5)                   | (6)                   | (7)                   | Don't Understand (0)  |
|----------------------------|-----------------------|-----------------------|-----------------------|-----------------------|-----------------------|-----------------------|-----------------------|-----------------------|
| 1.<br>(please name)<br>(1) | <input type="radio"/> | <input type="radio"/> | <input type="radio"/> | <input type="radio"/> | <input type="radio"/> | <input type="radio"/> | <input type="radio"/> | <input type="radio"/> |
| 2.<br>(please name)<br>(2) | <input type="radio"/> | <input type="radio"/> | <input type="radio"/> | <input type="radio"/> | <input type="radio"/> | <input type="radio"/> | <input type="radio"/> | <input type="radio"/> |
| 3.<br>(please name)<br>(3) | <input type="radio"/> | <input type="radio"/> | <input type="radio"/> | <input type="radio"/> | <input type="radio"/> | <input type="radio"/> | <input type="radio"/> | <input type="radio"/> |
| 4.<br>(please name)<br>(4) | <input type="radio"/> | <input type="radio"/> | <input type="radio"/> | <input type="radio"/> | <input type="radio"/> | <input type="radio"/> | <input type="radio"/> | <input type="radio"/> |

Display This Question:

If If <o:p></o:p> 1. (please name) Is Displayed

Q1339 Add more?

Yes (1)

No (2)



Q1342 Are there other languages/dialects you can speak?

Yes (1)

No (2)

*Display This Question:*

*If Q1342 = Yes*

Q1343

|        | (1)                   | (2)                   | (3)                   | (4)                   | (5)                   | (6)                   | (7)                   | Don't speak (0)       |
|--------|-----------------------|-----------------------|-----------------------|-----------------------|-----------------------|-----------------------|-----------------------|-----------------------|
| 1. (1) | <input type="radio"/> | <input type="radio"/> | <input type="radio"/> | <input type="radio"/> | <input type="radio"/> | <input type="radio"/> | <input type="radio"/> | <input type="radio"/> |
| 2. (2) | <input type="radio"/> | <input type="radio"/> | <input type="radio"/> | <input type="radio"/> | <input type="radio"/> | <input type="radio"/> | <input type="radio"/> | <input type="radio"/> |
| 3. (3) | <input type="radio"/> | <input type="radio"/> | <input type="radio"/> | <input type="radio"/> | <input type="radio"/> | <input type="radio"/> | <input type="radio"/> | <input type="radio"/> |
| 4. (4) | <input type="radio"/> | <input type="radio"/> | <input type="radio"/> | <input type="radio"/> | <input type="radio"/> | <input type="radio"/> | <input type="radio"/> | <input type="radio"/> |

*Display This Question:*

*If 1. Is Displayed*

Q1344 Add more?

Yes (1)

No (2)
